# Supplementary material for: The genetic control of leaf and petal allometric variations in Arabidopsis thaliana
Source: BMC Plant Biol. 2020 Dec 7;20:547. doi: 10.1186/s12870-020-02758-w (PMC7720488; doi:10.1186/s12870-020-02758-w)
Supplement: Supplementary file 5 — Additional file 5: Table S4. The candidate genes account for leaf and petal allometry variation. [file 12870_2020_2758_MOESM5_ESM.xlsx]

## Sheet: Sheet1
Table S4. The candidate genes account for leaf and petal allometry variation
Phenotype	QTL	Allele effects	Mutated genes	Name	Amino acids variation unique to accession	Description
Leaf4.PC1	LF4_1.4	Maximum in Mt-0, Minimum in Can-0	AT3G62900		Mt-0: V(436)-A, Y(929)-H	CW-type Zinc Finger
			AT3G62980	TIR1	Mt-0: 28 amino acid insertiong afeter M(1)	Auxin receptor that mediates Aux/IAA proteins proteasomal degradation and auxin-regulated transcription.
Leaf4.PC2	LF4_2.1	Maximum in Edi-0, Minimum in Ler-0	AT2G27120	TIL2	Ler-0: E(1522)-V, G(1529)-R, S(1566)-C, S(1696)-I	Contributes to the flowering time repression.
			AT2G27210	BSL3	Ler-0: A(43)-T	Phosphatase involved in elongation process, probably by acting as a regulator of brassinolide signaling.
Leaf7.PC1	LF7_1.1	Maximum in Rsch-4, Minimum in Can-0	AT3G49690	MYB84	Can-0: K(13)-N	Positively regulates axillary meristems (AMs) formation and development, especially during inflorescence.
Leaf7.PC1	LF7_1.2	Maximum in Rsch-4, Minimum in Can-0	AT3G49900		Can-0: Q(419)-K, K(517)-I	Phototropic-responsive NPH3 family protein
Leaf7.PC1	LF7_1.5	Maximum in Col-0, Minimum in Can-0	AT3G54230	SUA	Col-0: D(262)-N, F(920)-I	Suppressor of abi3-5
			AT3G54320	WRI1	Can-0: P(360)-X	WRINKLED 1
Leaf7.PC1	LF7_1.6	Maximum in Mt-0, Minimum in Can-0	AT3G59900	ARGOS	Can-0: S(116)-del	Promotes cell proliferation-dependent organ growth.
			AT3G60390	HAT3	Mt-0: G(146)-X	homeobox protein HAT3
			AT3G60630	SCL22	Can-0: G(114)-C	HAIRY MERISTEM 2
Leaf7.PC2	LF7_2.1	Maximum in Bur-0, Minimum in Ler-0	AT2G24800		Bur-0: R(52)-K	Peroxidase 18; Removal of H(2)O(2), oxidation of toxic reductants, biosynthesis and degradation of lignin, suberization, auxin catabolism
			AT2G25000	WRKY60	Ler-0: R(232)-K	Transcription factor. Interacts specifically with the W box (5'-(T)TGAC[CT]-3'), a frequently occurring elicitor- responsive cis-acting element (By similarity)
			AT2G25160	CYP82F1	Ler-0: S(136)-F	Member of CYP82F
			AT2G25930	ELF3	Bur-0: G(269)-S, Ler: T(644)-M	EARLY FLOWERING 3; May be a transcription factor part of a circadian clock input pathway.
			AT2G26330	TE1	Bur-0: T(225)-A, Ler: I(750)-K	ERECTA; Receptor kinase that, together with ERL1 and ERL2, regulates aerial architecture, including inflorescence (e.g. shoot apical meristem-originating organ shape, elongation of the internode and pedicels, and adaxial-abaxial polarity), and stomatal patterning (e.g. density and clustering), probably by tuning cell division and expansion.
			AT2G26430	RCY1	Ler-0: I(141)-V	RCY1 - cyclin-L1-1; Cognate cyclin for CDKG1. Required for synapsis and male meiosis, and for the proper splicing of specific resistance (R) genes. Involved in regulation of DNA methylation and transcriptional silencing [a.k.a. CYCL1-1, T9J22.10, MOS12, At2g26430, AT2G26430, ...]
			AT2G26620		Bur-0: 53 amino acid deletion after M(1), S(172)-R, G(222)-R; Ler: S(52)-T, M(154)-I, A(227)-V, S(328)-stop coden	AT2G26620 - Pectin lyase-like protein
			AT2G26700	PID2	Bur-0: A(72)-T	PID2 - PINOID2; Serine/threonine-protein kinase involved in the regulation of auxin signaling.
			AT2G27040	AGO4	Bur-0: T(44)-I	AGO4 - ARGONAUTE 4; Together with RDM3, required for transcriptional gene silencing (TGS) by DNA methylation and repressive histone modifications (H3K9me2) of several chromatin loci (PubMed:21738482). Component of the RISC complex that associate with the small interfering RNA (siRNA) pathway involved in direct cytosine methylation at endogenous DNA repeats. Forms a AGO4/NRPE1/siRNA complex in caj…
			AT2G27120	TIL2	Ler-0: L(736)-F, E(1522)-V, G(1529)-R, S(1566)-C, S(1696)-I	TIL2 - TILTED 2; DNA polymerase II participates in chromosomal DNA replication (By similarity). Involved in the determination of cell fate during plant embryogenesis. Contributes to the flowering time repression [a.k.a. At2g27120, T20P8.17, POL2B, AT2G27120]
			AT2G27210	BSL3	Ler-0: A(43)-T	BSL3 - BRI1 suppressor 1 (BSU1)-like 3; Phosphatase involved in elongation process, probably by acting as a regulator of brassinolide signaling [a.k.a. T22O13.2, At2g27210, PUT-163a-Arabidopsis_thaliana-276405, AT2G27210]
			AT2G28550	RAP2.7	Ler-0: A(80)-V	RAP2.7 - Related to AP2.7; Probably acts as a transcriptional activator. Binds to the GCC-box pathogenesis-related promoter element. May be involved in the regulation of gene expression by stress factors and by components of stress signal transduction pathways (By similarity). Regulates negatively the transition to flowering time and confers flowering time delay [a.k.a. At2g28550, T17D12.11, RAP2…
Leaf7.PC3	LF7_3.1	Minimum in Po-0	AT1G32770	NAC012	Po-0: M(231)-L	NAC domain containing protein 12; Transcriptional activator of genes involved in biosynthesis of secondary walls. Together with NST1, required for the secondary cell wall thickening and lignification of sclerenchymatous fibers and secondary xylem vessels (tracheary elements). Seems to repress the secondary cell wall thickening of xylary fibers. May also regulate the secondary cell wall lignificat…
Leaf7.PC3	LF7_3.3	Maximum in Edi-0, Minimum in Ler-0	AT2G40080	ELF4	Ler-0: R(3)-K	EARLY FLOWERING 4; Component of the central CCA1/LHY-TOC1 feedback loop in the circadian clock that promotes clock accuracy and is required for sustained rhythms in the absence of daily light/dark cycles. Part of a corepressor complex consisting of ELF4, ELF3, and LUX involved in the transcriptional regulation of APRR9. Increases ELF3 nuclear distribution and localization in nuclear bodies. Requi…
			AT2G40220	ABI4	Edi-0: P(115)-S, A(263)-T	ABA INSENSITIVE 4; Transcription regulator that probably binds to the GCC- box pathogenesis-related promoter element. Binds also to the S-box (5'-CACTTCCA-3') photosynthesis-associated nuclear genes-related (PhANGs-related) promoter element, and thus acts as a transcription inhibitor. Involved in the regulation of gene expression by stress factors and by components of stress signal transduction p…
			AT2G40260		Edi-0: T(158)-N, H(346)-Y	Myb family transcription factor
Petal.PC1	PE_1.2	Maximum in No-0, Minimum in Hi-0	AT1G44110	Cyclin A1;1	No-0: V(79)-I; A(379)-S	Cyclin A1;1 (CYCA1;1).
			AT1G43850	SEU	Hi-0: del (150-154)	Encodes a transcriptional co-regulator of AGAMOUS.
			AT1G44830		Hi-0: S(165)-Y	encodes a member of the DREB subfamily A-5 of ERF/AP2 transcription factor family.
			AT1G45000		Hi-0: A(8)-V	AAA-type ATPase family protein.
			AT1G46408		Hi-0: A(49)-V; N(55)-D; I(187)-L	AGAMOUS-like 97 (AGL97).
Petal.PC1	PE_1.3	Maximum in Bur-0, Minimum in No-0	AT4G00231	MEE50	Bur-0: N(71)-K; No-0: S(64)-P	maternal effect embryo arrest 50 .
			AT4G00340	RLK4	Bur-0: P(504)-Q; V(757)-L	Encodes a receptor-like protein kinase that is expressed in roots.
Petal.PC2	PE_2.1	Maximum in Ler-0, Minimum in Rsch-4	AT1G63170		Ler-0: G(113)-E	Zinc finger, C3HC4 type (RING finger) family protein.
Petal.PC2	PE_2.6	Maximum in Tsu-0, Minimum in Sf-2	AT3G51360		Tsu-0: T(324)-S	Eukaryotic aspartyl protease family protein.
Petal.PC2	PE_2.8	Maximum in Edi-0, Minimum in Ws-2	AT5G02900		Edi-0: D(257)-N	CYP96A13.
			AT5G03680	PTL	Edi-0: S(250)-T	Recessive mutations are defective in organ initiation and orientation in the second whorl.
			AT5G04240	ELF6	Edi-0: L(936)-P; Ws-0: E(726)-K; M(951)-L; V(995)-L	Encodes a Jumonji N/C and zinc finger domain-containing protein that acts as a repressor in the photoperiod pathway.
			AT5G04630	CYP77A9	Edi-0: T(234)-I	CYP77A9.
			AT5G04820	OFP13	Edi-0: S(10)-Y	OFP13.
			AT5G06000	EIF3G2	Edi-0: C(140)-Y	One of the 2 genes that code for the G subunit of eukaryotic initiation factor 3.
			AT5G07280	EMS1	Edi-0: L(835)-V	putative leucine-rich repeat receptor protein kinase.
			AT5G07300	BON2	Edi-0: L(334)-I	Encodes a copine-like protein.
			AT5G09350	PI-4KBETA2	Ws-0: K(389)-S	phosphatidylinositol 4-OH kinase, PI-4Kbeta2.
			AT5G02880	UPL4	Ws-0: E(298)-Q; S(923)-L	ubiquitin-protein ligase containing a HECT domain.
Petal.PC2	PE_2.9	Maximum in Can-0, Minimum in Ws-2	AT5G14250	FUS11	Can-0: I(15)-T; N(338)-S	subunit 3 of the COP9 signalosome.
			AT5G14380	AGP6	Can-0: V(7)-F	an arabinogalactan protein that is expressed in pollen, pollen sac and pollen tube.
			AT5G14400	CYP724A1	Can-0: E(249)-G; A(318)-E; G(325)-E	brassinosteroid C-22 hydroxylase.
			AT5G14750	MYB66	Can-0: V(5)-I	MyB-related protein containing R2 and R3 repeats, involved in root and hypocotyl epidermal cell fate determination.
